# Supplementary material for: Use of monolithic silicon carbide aerogel as a reusable support for development of regenerable CO2adsorbent
Source: Royal Society of Chemistry journal article supplement (doi:10.1039/c4ra11261j), 2014-11-11
Supplement: c4ra11261j1.pdf [file c4ra11261j1.pdf]

Supplementary Information for

## **Use of monolithic silicon carbide aerogel as a reusable support for development of regenerable CO<sub>2</sub> adsorbent**

Yong Kong<sup>1,2</sup>, Xiaodong Shen<sup>1,2,\*</sup>, Sheng Cui<sup>1,2</sup> and Maohong Fan<sup>3,4,\*</sup>

<sup>1</sup> College of Materials Science and Engineering, Nanjing Tech University, Nanjing 210009, PR China

<sup>2</sup> State Key Laboratory of Materials-Oriented Chemical Engineering, Nanjing Tech University, Nanjing 210009, PR China

<sup>3</sup> Department of Chemical and Petroleum Engineering, University of Wyoming, Laramie, WY 82071, USA.

<sup>4</sup> School of Civil and Environmental Engineering, Georgia Institute of Technology, Atlanta, GA 30332, USA.

\* To whom correspondence should be addressed. E-mail: [xdshen@njtech.edu.cn](mailto:xdshen@njtech.edu.cn); [mfan@uwyo.edu](mailto:mfan@uwyo.edu)

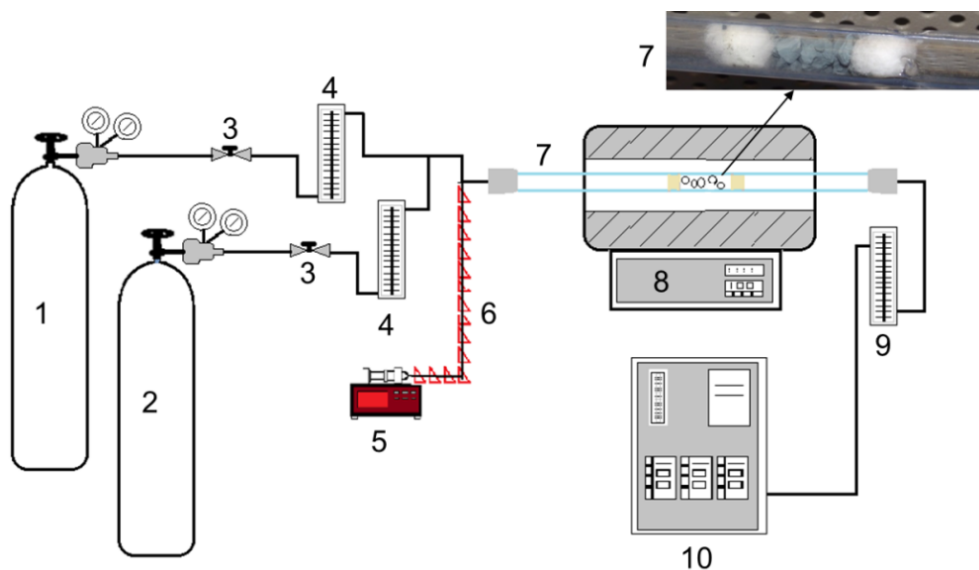

**Fig. S1** CO<sub>2</sub> capture setup: (1) N<sub>2</sub> cylinder; (2) N<sub>2</sub>+CO<sub>2</sub> mixture gas cylinder; (3) valves; (4) flow meter (FM-1050, Matheson Tri-gas Inc.); (5) syringe pump (NE-300 Just Infusion, New Era Pump Systems); (6) heat tap with a controller (MiniTrol, Glas-Col Inc); (7) circular glass tube reactor (9 × 610 mm); (8) tube furnace (MTI GSL-1100X); (9) flow meter for gas leakage and back pressure checking (FM-1050, Matheson Tri-gas Inc.); (10) gas analyzer with data recorder [ZSU-BY3000, Fuji Electric (China) Co. Ltd.].

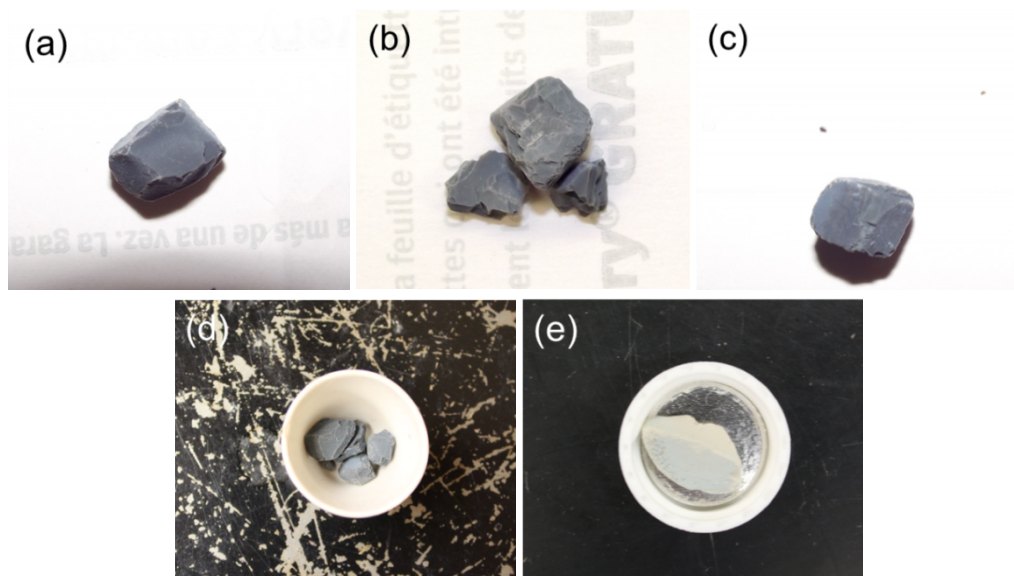

**Fig. S2** Photos of (a) MSiCA, (b) AFMSiCA, (c) RF-MSiCA-6 (d) RF-MSiCA-12 and (e) RF-MSiCA-18.

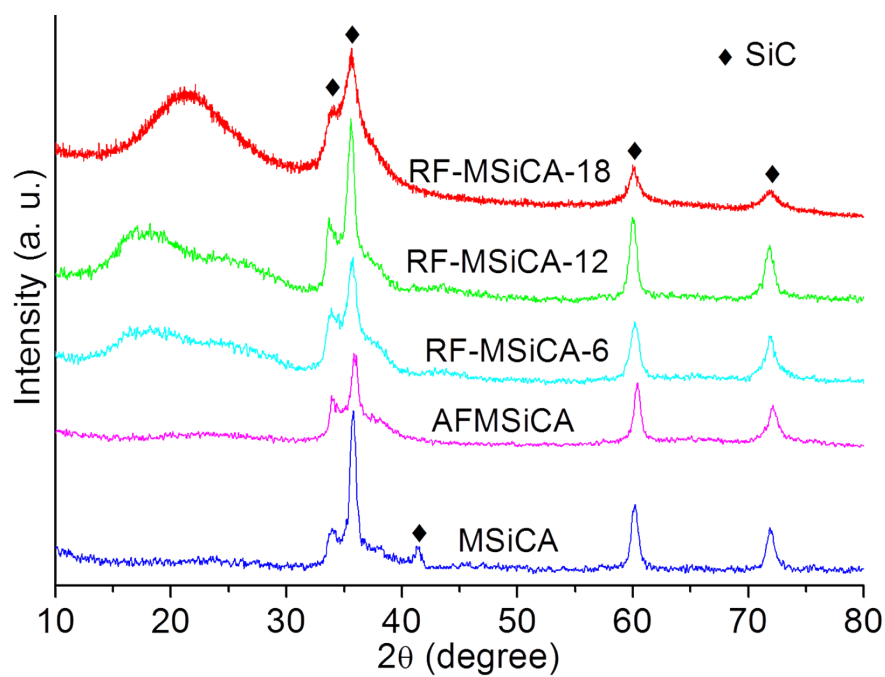

**Fig. S3** XRD patterns of MSiCA, AFMSiCA and RF-MSiCA-x.

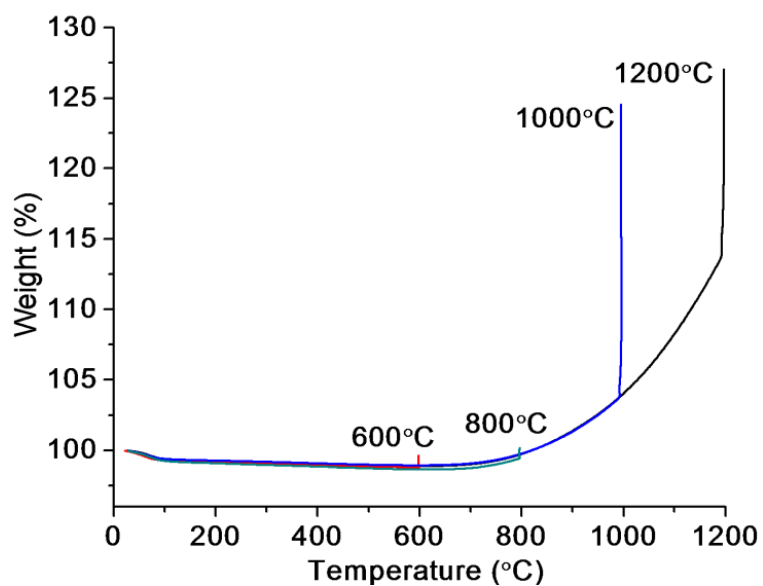

**Fig. S4** TG curves of MSiCA (air flow of 30 ml/min, heating rate of 20 °C/min, the final temperatures were held for 2 h).

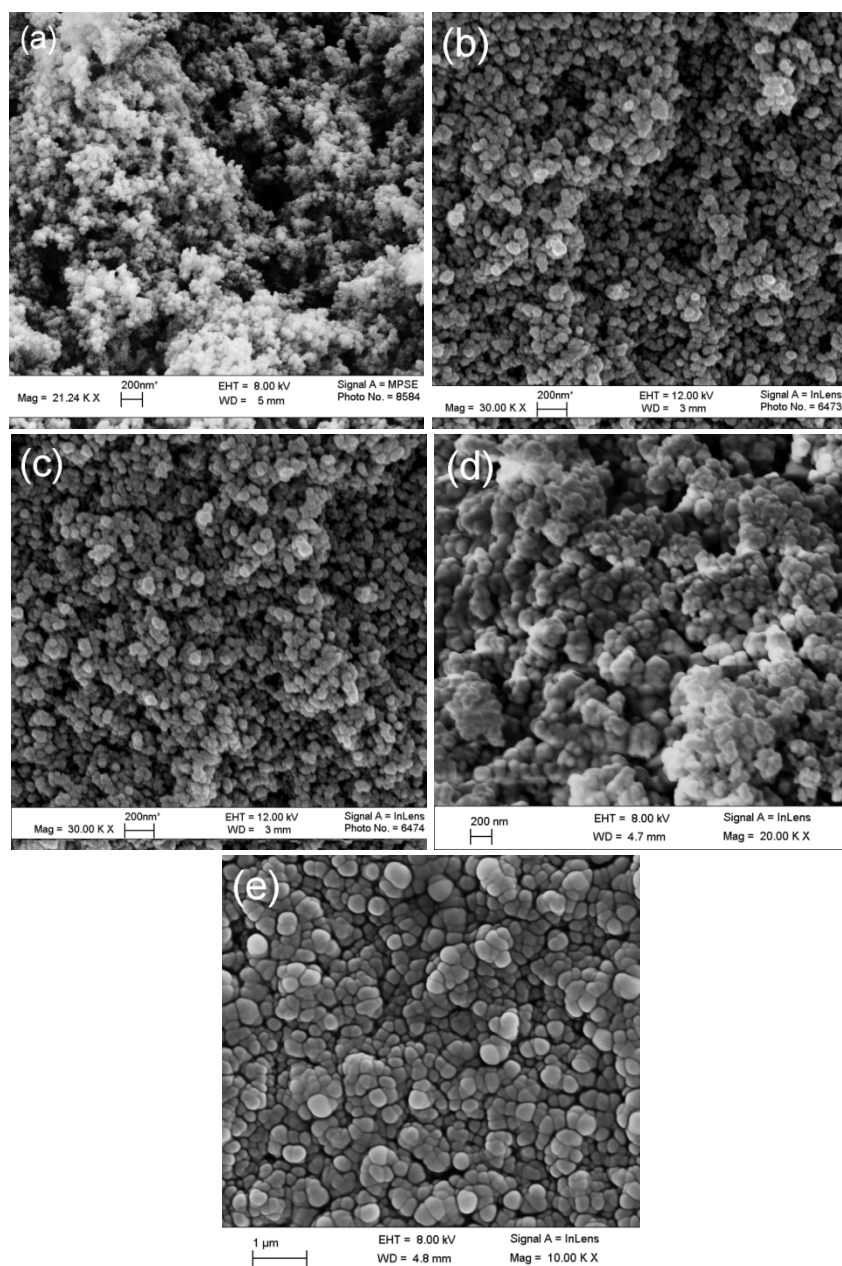

**Fig. S5** SEM images of (a) MSiCA, (b) AFMSiCA, (c) RF-MSiCA-6, (d) RF-MSiCA-12 and (e) RF-MSiCA-18.

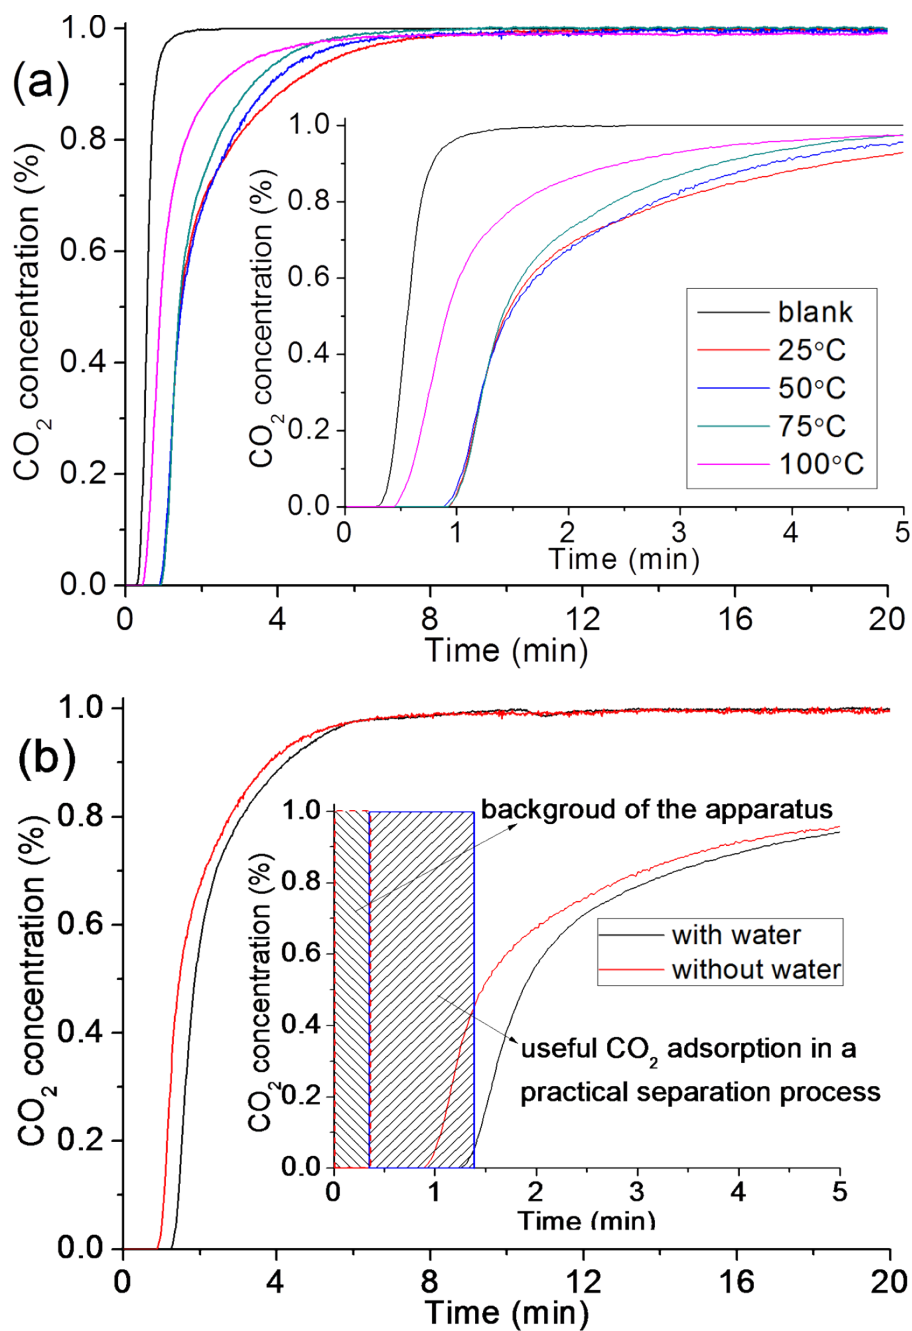

**Fig. S6** (a) CO<sub>2</sub> adsorption profiles of AFMSiCA at different temperatures in the absence of water; (b) CO<sub>2</sub> adsorption profiles of AFMSiCA at 50 °C with and without water.

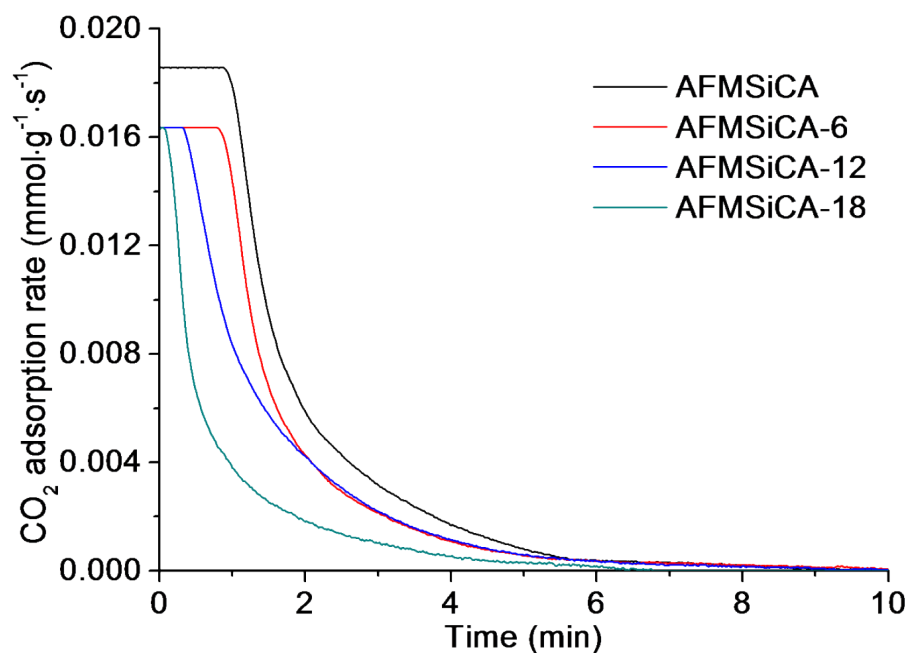

**Fig. S7** CO<sub>2</sub> adsorption rates of RF-MSiCA-x at 50 °C in the presence of water.

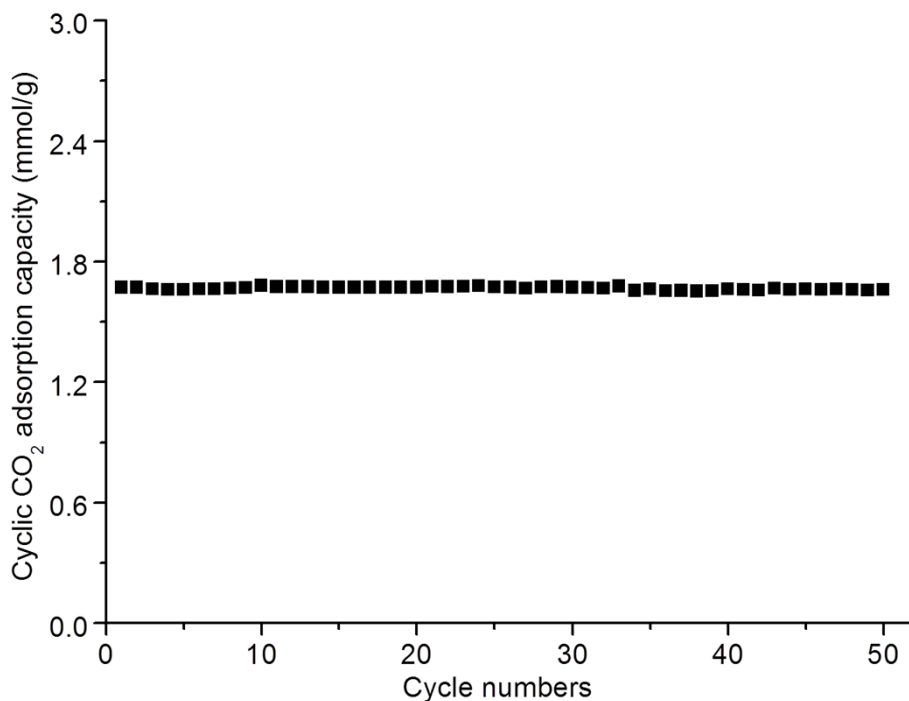

**Fig. S8** Cyclic adsorption capacities of AFMSiCA at 50 °C in the absence of water (adsorption time of 20 min; adsorption gas flow rate of 310 ml/min; weight of adsorbent: 0.150g; desorption gas flow rate of 310 ml/min; desorption temperature of 100 °C).

**Table S1** APTES loadings of the samples in MSiCA

| Sample      | APTES loading (%) |
|-------------|-------------------|
| AFMSiCA     | 38.1              |
| RF-MSiCA-6  | 32.3              |
| RF-MSiCA-12 | 27.7              |
| RF-MSiCA-18 | 15.7              |
